# Supplementary material for: Structural diversity in aroylthiourea copper complexes – formation and biological evaluation of [Cu(i)(μ-S)SCl]2, cis-Cu(ii)S2O2, trans-Cu(ii)S2O2and Cu(i)S3cores
Source: Royal Society of Chemistry journal article supplement (doi:10.1039/c5nj03536h), 2016-01-01
Supplement: c5nj03536h1.pdf [file c5nj03536h1.pdf]

## Electronic Supplementary Material (ESI) for New J. Chem.

### Supporting Information

#### **Structural Diversity in Aroylthiourea Copper Complexes – Formation and Biological Evaluation of [Cu(I)( $\mu$ -S)SCI]<sub>2</sub>, *cis*-Cu(II)S<sub>2</sub>O<sub>2</sub>, *trans*-Cu(II)S<sub>2</sub>O<sub>2</sub> and Cu(I)S<sub>3</sub> cores**

Nagamani Selvakumaran<sup>a</sup>, Lakshmanan Sandhiya<sup>b</sup>, Nattamai S.P. Bhuvanesh<sup>c</sup>, Kittusamy Senthilkumar<sup>b</sup>, Ramasamy Karvembu<sup>a\*</sup>

<sup>a</sup>Department of Chemistry, National Institute of Technology, Tiruchirappalli-620015, India

<sup>b</sup>Department of Physics, Bharathiar University, Coimbatore-641046, India,

<sup>c</sup>Department of Chemistry, Texas A & M University, College Station, TX 77842, USA

**Table S1** Selected optimized singlet state ( $S_0$ ) and triplet state ( $T_1$ ) geometrical parameters of complex **1** (Bond length, R in Å, Bond angle,  $\theta$  in degrees and dihedral angle,  $\phi$  in degrees) along with the X-ray crystal diffraction data (For numbering of atoms see Fig. 6).

| Geometrical parameters | XRD   | Calculated   |       |               |       |
|------------------------|-------|--------------|-------|---------------|-------|
|                        |       | <b>B3LYP</b> |       | <b>M06-2X</b> |       |
|                        |       | $S_0$        | $T_1$ | $S_0$         | $T_1$ |
| R(Cu1-Cu2)             | 2.670 | 2.753        | 2.980 | 2.843         | 2.887 |
| R(Cu1-S1)              | 2.346 | 2.359        | 2.378 | 2.427         | 2.441 |
| R(Cu1-Cl1)             | 2.325 | 2.380        | 2.369 | 2.397         | 2.406 |
| R(Cu1-S4)              | 2.294 | 2.495        | 2.349 | 2.532         | 2.485 |
| R(Cu2-S4)              | 2.356 | 2.478        | 2.363 | 2.550         | 2.568 |
| R(Cu2-S2)              | 2.276 | 2.380        | 2.345 | 2.416         | 2.397 |
| R(Cu2-Cl2)             | 2.334 | 2.394        | 2.363 | 2.429         | 2.392 |
| R(Cu2-S3)              | 2.346 | 2.442        | 2.450 | 2.517         | 2.493 |
| R(S1-C1)               | 1.696 | 1.707        | 1.709 | 1.696         | 1.695 |
| R(S3-C25)              | 1.707 | 1.719        | 1.728 | 1.714         | 1.724 |
| R(S2-C13)              | 1.701 | 1.701        | 1.714 | 1.694         | 1.699 |
| R(S4-C37)              | 1.709 | 1.725        | 1.787 | 1.718         | 1.738 |
| R(C37-N7)              | 1.399 | 1.388        | 1.405 | 1.392         | 1.403 |
| R(C37-N8)              | 1.399 | 1.335        | 1.387 | 1.317         | 1.406 |
| R(N8-C45)              | 1.482 | 1.481        | 1.467 | 1.473         | 1.462 |
| R(N8-C47)              | 1.482 | 1.478        | 1.464 | 1.480         | 1.458 |
| R(N7-H43)              | 0.899 | 1.032        | 1.023 | 1.031         | 1.020 |
| R(N7-C38)              | 1.376 | 1.389        | 1.369 | 1.374         | 1.359 |
| R(C38-O4)              | 1.222 | 1.212        | 1.222 | 1.208         | 1.215 |
| R(C13-N4)              | 1.325 | 1.340        | 1.333 | 1.327         | 1.328 |
| R(N4-C23)              | 1.479 | 1.478        | 1.485 | 1.473         | 1.474 |
| R(N4-C21)              | 1.481 | 1.478        | 1.479 | 1.472         | 1.472 |
| R(C13-N3)              | 1.399 | 1.403        | 1.392 | 1.402         | 1.397 |
| R(N3-H15)              | 0.901 | 1.028        | 1.024 | 1.024         | 1.024 |
| R(N3-C14)              | 1.389 | 1.392        | 1.396 | 1.387         | 1.389 |
| R(C14-O2)              | 1.211 | 1.214        | 1.214 | 1.208         | 1.206 |
| R(C25-N6)              | 1.318 | 1.339        | 1.335 | 1.327         | 1.324 |
| R(C25-N5)              | 1.392 | 1.386        | 1.385 | 1.384         | 1.381 |
| R(N6-C33)              | 1.491 | 1.480        | 1.482 | 1.474         | 1.476 |
| R(N6-C35)              | 1.489 | 1.477        | 1.478 | 1.477         | 1.477 |
| R(N5-C26)              | 1.378 | 1.392        | 1.396 | 1.385         | 1.388 |
| R(C26-O3)              | 1.225 | 1.213        | 1.212 | 1.206         | 1.205 |
| R(N5-H29)              | 0.899 | 1.032        | 1.032 | 1.029         | 1.028 |

|                            |       |       |       |       |       |
|----------------------------|-------|-------|-------|-------|-------|
| R(C26-C27)                 | 1.490 | 1.506 | 1.506 | 1.503 | 1.502 |
| R(C1-N2)                   | 1.313 | 1.338 | 1.338 | 1.325 | 1.324 |
| R(C1-N1)                   | 1.423 | 1.397 | 1.395 | 1.397 | 1.398 |
| R(N1-H1)                   | 0.900 | 1.028 | 1.029 | 1.023 | 1.027 |
| R(N1-C2)                   | 1.369 | 1.390 | 1.391 | 1.387 | 1.384 |
| R(C2-O1)                   | 1.212 | 1.217 | 1.217 | 1.210 | 1.211 |
| R(C2-C3)                   | 1.495 | 1.504 | 1.503 | 1.497 | 1.498 |
| R(N2-C11)                  | 1.468 | 1.476 | 1.476 | 1.468 | 1.468 |
| R(N2-C9)                   | 1.486 | 1.479 | 1.479 | 1.475 | 1.476 |
| $\theta$ (C25-S3-Cu1)      | 112.5 | 110.1 | 111.7 | 104.2 | 105.9 |
| $\theta$ (S3-Cu2-Cl2)      | 110.9 | 111.2 | 110.9 | 112.2 | 115.2 |
| $\theta$ (Cl2-Cu2-S2)      | 119.0 | 108.2 | 113.5 | 103.6 | 109.3 |
| $\theta$ (S2-Cu2-S4)       | 116.8 | 113.9 | 104.4 | 114.6 | 103.2 |
| $\theta$ (Cu2-S4-C37)      | 116.5 | 109.7 | 110.9 | 104.9 | 98.7  |
| $\theta$ (C37-S4-Cu1)      | 108.9 | 109.7 | 108.4 | 106.0 | 106.5 |
| $\theta$ (S4-Cu1-Cl1)      | 111.5 | 108.3 | 114.2 | 107.7 | 99.5  |
| $\theta$ (Cl1-Cu1-S1)      | 119.1 | 116.1 | 114.3 | 116.5 | 112.8 |
| $\theta$ (Cu1-S1-C1)       | 107.5 | 110.7 | 112.1 | 104.3 | 102.7 |
| $\theta$ (S1-Cu1-S3)       | 116.8 | 115.7 | 111.4 | 103.9 | 101.3 |
| $\theta$ (C25-S3-Cu2)      | 112.6 | 111.4 | 111.4 | 106.9 | 106.3 |
| $\theta$ (Cu2-S2-C13)      | 109.8 | 110.7 | 106.6 | 105.1 | 107.2 |
| $\theta$ (S2-C13-N3)       | 118.6 | 119.7 | 119.2 | 119.6 | 120.1 |
| $\theta$ (S2-C13-N4)       | 122.8 | 122.2 | 121.7 | 123.0 | 122.1 |
| $\theta$ (S4-C37-N7)       | 119.3 | 118.7 | 119.4 | 118.0 | 120.4 |
| $\theta$ (S4-C37-N8)       | 122.9 | 122.6 | 114.4 | 122.5 | 108.9 |
| $\theta$ (S1-C1-N1)        | 118.4 | 119.4 | 119.6 | 118.9 | 119.0 |
| $\theta$ (S1-C1-N2)        | 124.6 | 122.5 | 122.3 | 124.7 | 125.1 |
| $\theta$ (S3-C25-N6)       | 123.2 | 121.8 | 121.8 | 122.1 | 122.2 |
| $\theta$ (S3-C25-N5)       | 119.1 | 119.5 | 119.2 | 118.8 | 118.7 |
| $\varphi$ (C25-S3-Cu2-Cl2) | 1.3   | 7.0   | 1.7   | 17.4  | 0.2   |
| $\varphi$ (C25-S3-Cu1-S1)  | -9.9  | -5.9  | -6.5  | -16.8 | -20.3 |
| $\varphi$ (Cl1-Cu1-S4-C37) | 1.8   | -13.7 | -6.0  | -15.9 | -31.8 |
| $\varphi$ (Cl1-Cu1-S1-C1)  | 2.3   | 17.6  | 9.6   | 37.0  | 43.8  |

**Table S2** Frontier molecular orbital compositions (%) for the complex **1** in ground state

| Orbital | Energy (eV) | Contribution (%) |       |       |        | Main bond type                                                   |
|---------|-------------|------------------|-------|-------|--------|------------------------------------------------------------------|
|         |             | 2Cu              | 4S    | 2Cl   | Ligand |                                                                  |
| L+5     | -1.059      | 1.33             | 4.89  | 0.23  | 93.55  | $\pi^*(\text{ligand})$                                           |
| L+4     | -1.119      | 4.60             | 6.00  | 0.32  | 89.08  | $\pi^*(\text{ligand})$                                           |
| L+3     | -1.631      | 5.60             | 9.31  | 0.27  | 84.82  | $\pi^*(\text{ligand})$                                           |
| L+2     | -1.746      | 4.16             | 9.52  | 0.62  | 85.70  | $\pi^*(\text{ligand})$                                           |
| L+1     | -1.835      | 4.77             | 8.57  | 0.57  | 86.09  | $\pi^*(\text{ligand})$                                           |
| L       | -1.963      | 1.63             | 6.96  | 0.15  | 91.26  | $\pi^*(\text{ligand})$                                           |
| H       | -5.417      | 35.50            | 39.72 | 5.11  | 19.67  | $d(\text{Cu}) + p(\text{S}) + \pi(\text{ligand})$                |
| H-1     | -5.512      | 39.71            | 40.67 | 5.94  | 13.68  | $d(\text{Cu}) + p(\text{S}) + \pi(\text{ligand})$                |
| H-2     | -5.612      | 47.57            | 27.22 | 14.99 | 10.22  | $d(\text{Cu}) + p(\text{S}) + p(\text{Cl}) + \pi(\text{ligand})$ |
| H-3     | -5.825      | 40.71            | 27.45 | 17.03 | 14.81  | $d(\text{Cu}) + p(\text{S}) + p(\text{Cl}) + \pi(\text{ligand})$ |
| H-4     | -5.951      | 37.81            | 28.76 | 18.66 | 14.78  | $d(\text{Cu}) + p(\text{S}) + p(\text{Cl}) + \pi(\text{ligand})$ |
| H-5     | -6.180      | 41.48            | 26.70 | 12.85 | 18.97  | $d(\text{Cu}) + p(\text{S}) + p(\text{Cl}) + \pi(\text{ligand})$ |

**Table S3** Atomic charges of selected atoms of the important bonds of the complex **1** (For numbering of atoms see **Fig. 6**).

| Atoms | Atomic Charges |                |
|-------|----------------|----------------|
|       | S <sub>0</sub> | T <sub>1</sub> |
| Cu1   | 0.756          | 0.823          |
| Cu2   | 0.754          | 0.918          |
| Cl1   | -0.796         | -0.808         |
| Cl2   | -0.801         | -0.784         |
| S1    | -0.321         | -0.330         |
| S2    | -0.307         | -0.275         |
| S3    | -0.356         | -0.364         |
| S4    | -0.372         | -0.355         |
| C13   | 0.359          | 0.375          |
| C37   | 0.388          | 0.195          |
| C1    | 0.363          | 0.365          |
| C25   | 0.380          | 0.396          |
| N1    | -0.686         | -0.688         |
| N2    | -0.419         | -0.418         |
| N3    | -0.687         | -0.681         |
| N4    | -0.413         | -0.403         |
| N5    | -0.683         | -0.682         |
| N6    | -0.413         | -0.403         |
| N7    | -0.687         | -0.690         |
| N8    | -0.404         | -0.443         |

**Table S4** DNA binding constant ( $K_b$ ), quenching constant ( $K_q$ ) and apparent binding constant ( $K_{app}$ ) values.

| Complex  | $K_b$ ( $M^{-1}$ ) | $K_q$ ( $M^{-1}$ ) | $K_{app}$ ( $M^{-1}$ ) |
|----------|--------------------|--------------------|------------------------|
| <b>1</b> | $3.59 \times 10^4$ | $4.50 \times 10^4$ | $2.25 \times 10^6$     |
| <b>2</b> | $3.16 \times 10^4$ | $4.14 \times 10^4$ | $2.07 \times 10^6$     |
| <b>3</b> | $2.36 \times 10^4$ | $3.81 \times 10^4$ | $1.91 \times 10^6$     |
| <b>4</b> | $1.96 \times 10^4$ | $3.32 \times 10^4$ | $1.66 \times 10^6$     |

**Table S5** Protein binding constant ( $K_b$ ), quenching constant ( $K_q$ ) and number of binding sites ( $n$ ) values.

| Complex  | $K_b$ ( $M^{-1}$ ) | $K_q$ ( $M^{-1}$ ) | $N$  |
|----------|--------------------|--------------------|------|
| <b>1</b> | $1.09 \times 10^6$ | $2.21 \times 10^5$ | 1.18 |
| <b>2</b> | $5.78 \times 10^5$ | $1.41 \times 10^5$ | 1.11 |
| <b>3</b> | $3.36 \times 10^5$ | $1.09 \times 10^4$ | 1.09 |
| <b>4</b> | $1.23 \times 10^5$ | $9.24 \times 10^4$ | 1.03 |

**Table S6** *In vitro* cytotoxicity of the Cu complexes in MCF7 and A549 cancer cell lines

| Compound         | IC50 ( $\mu M$ ) |        |
|------------------|------------------|--------|
|                  | A549             | MCF7   |
| <b>1</b>         | 63.73            | 70.71  |
| <b>2</b>         | 103.85           | 81.69  |
| <b>3</b>         | 160.85           | 155.44 |
| <b>4</b>         | 50.00            | 20.45  |
| Cyclophosphamide | 41.84            | 11.89  |

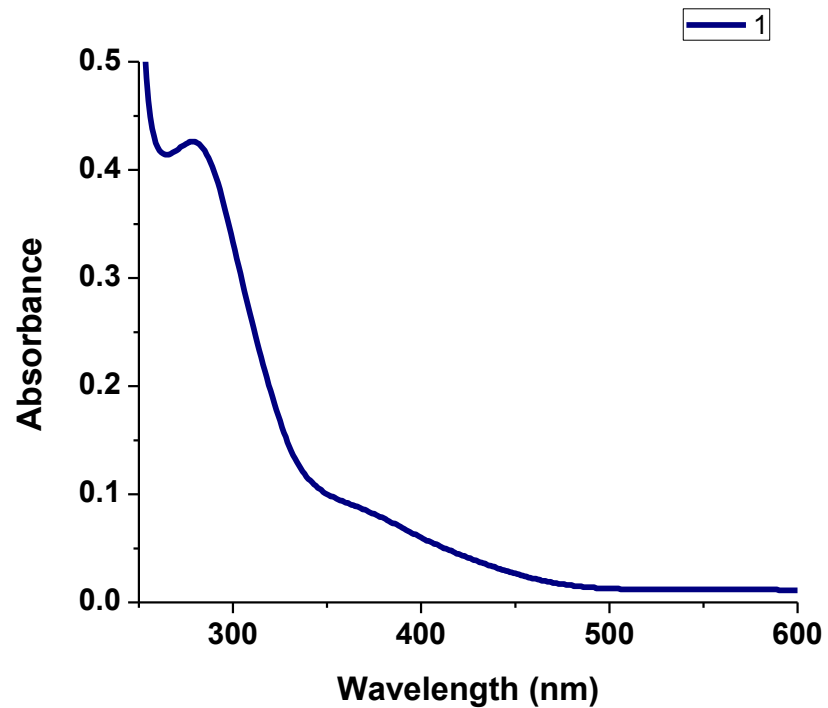

**Fig. S1** Absorption spectrum of **1** in DMF ( $\pi \rightarrow \pi^* = 227$  nm,  $n \rightarrow \pi^* = 280$  nm and MLCT = 370 nm).

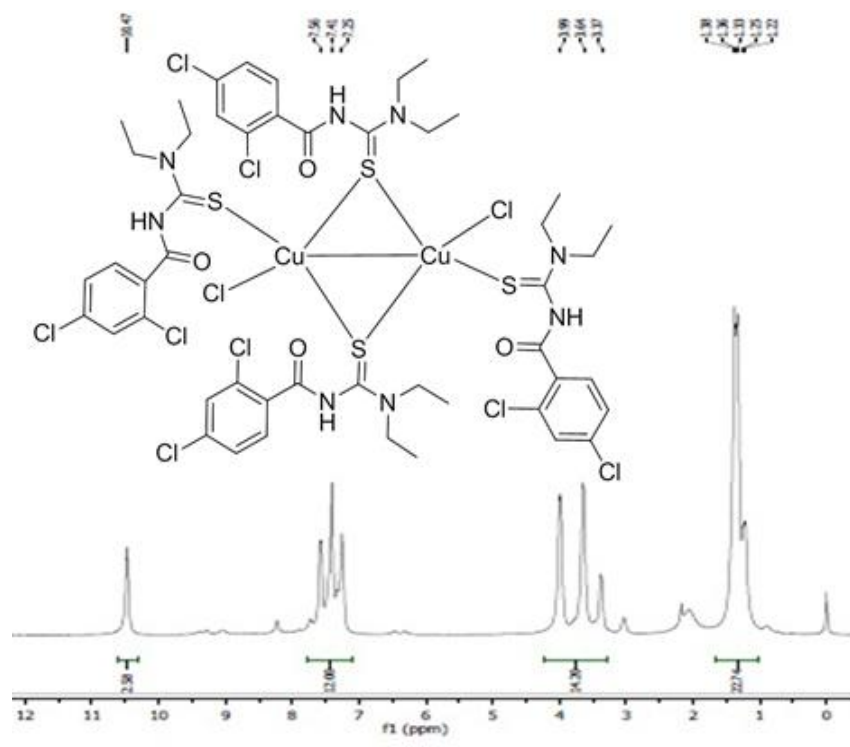

**Fig. S2** <sup>1</sup>H NMR spectrum of **1**.

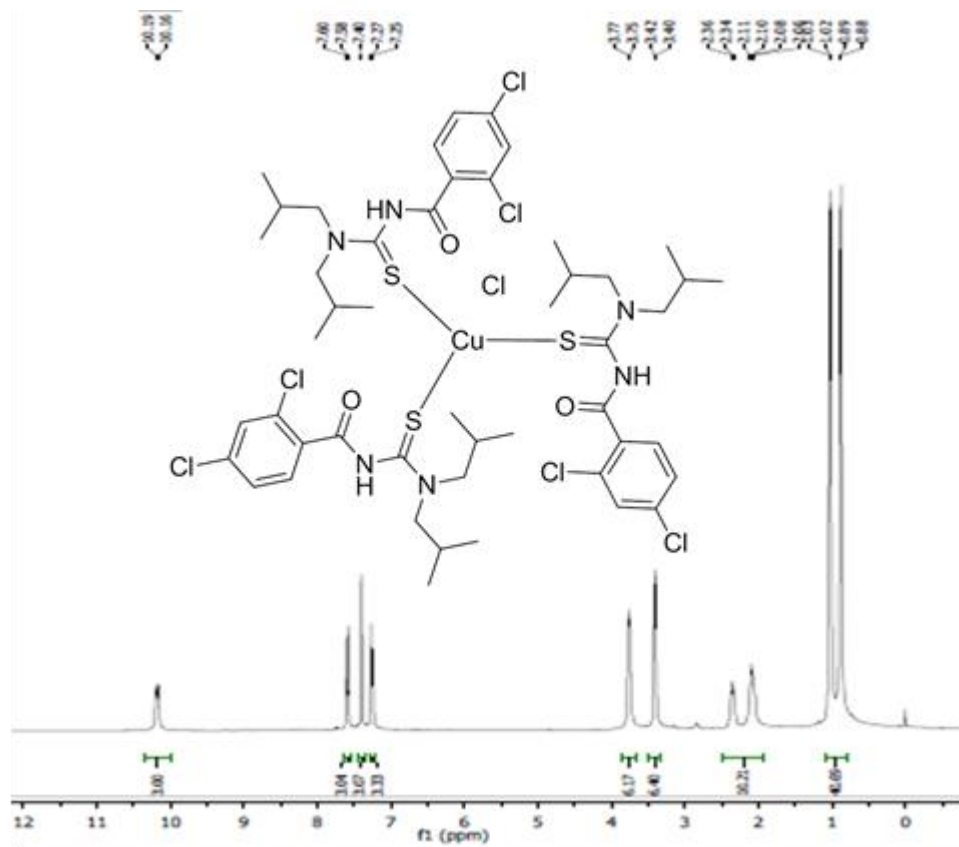

**Fig. S3**  $^1\text{H}$  NMR spectrum of **3**.

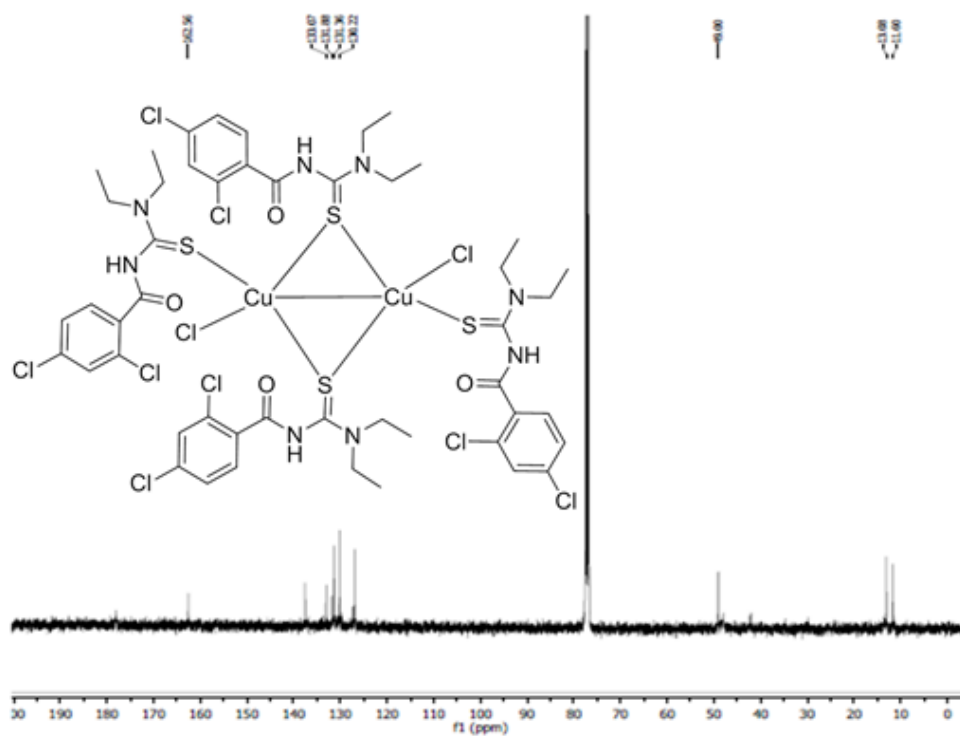

**Fig. S4**  $^{13}\text{C}$  NMR spectrum of **1**.

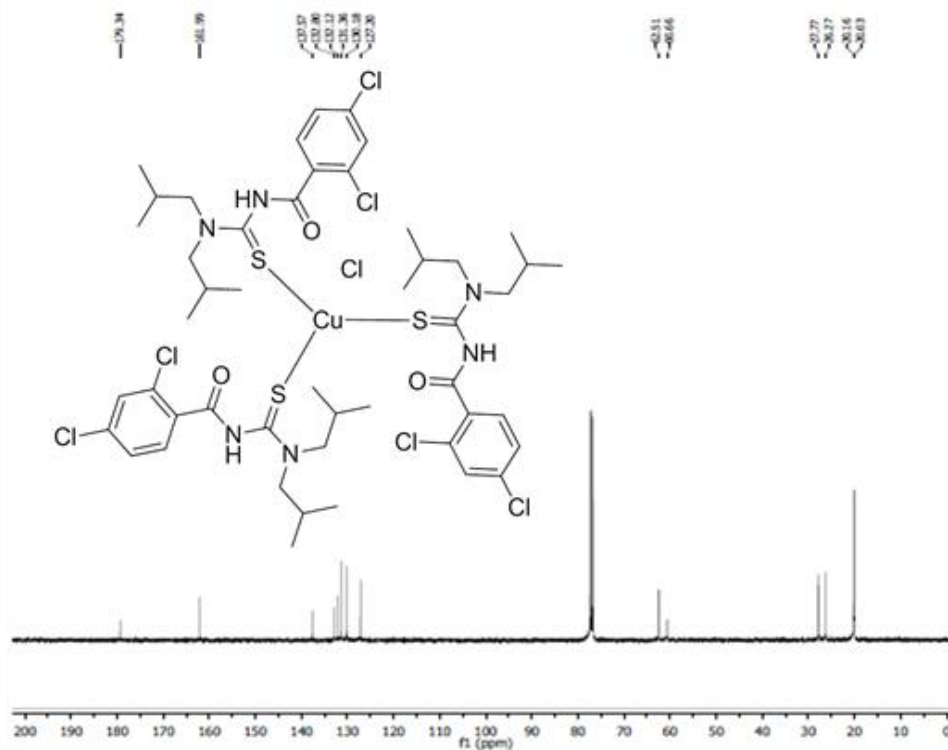

**Fig. S5** <sup>13</sup>C NMR spectrum of **3**.

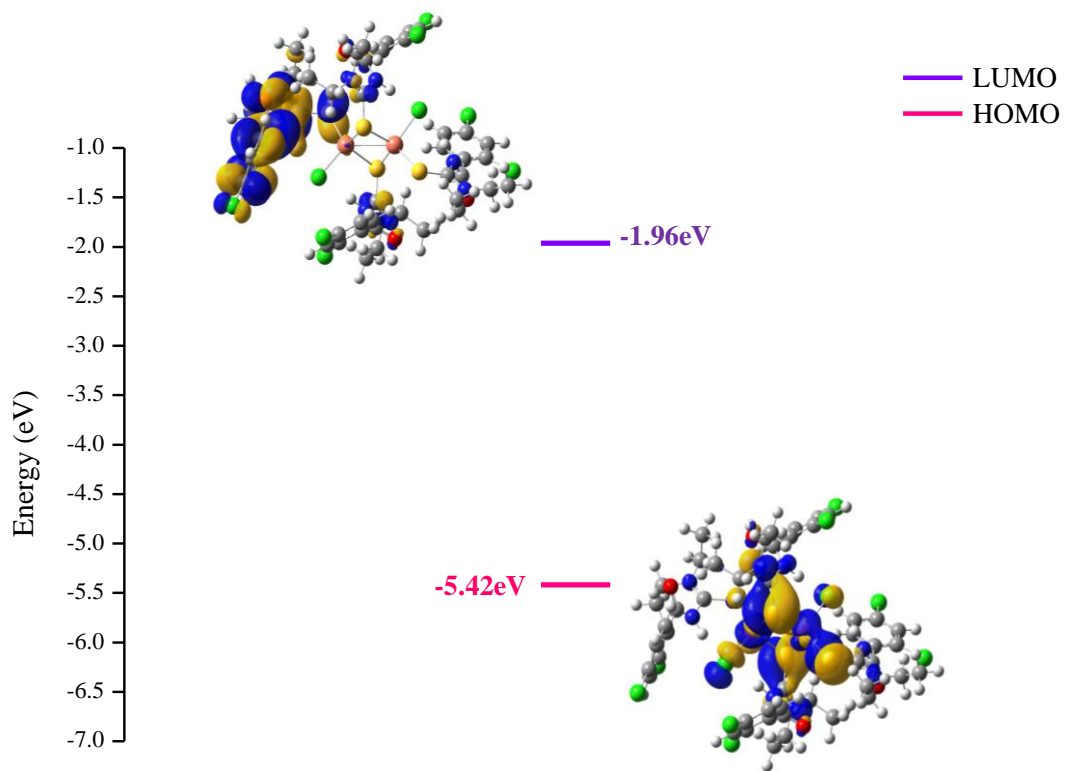

**Fig. S6** Energy level plot of HOMO and LUMO for complex **1**.



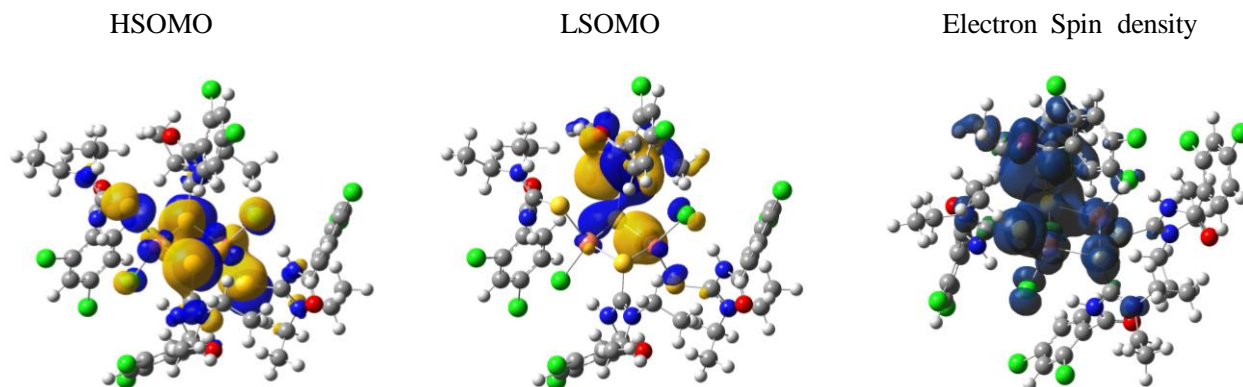

**Fig. S7** Isodensity surface plots of the HSOMO and LSOMO and electron spin density of **1** in  $T_1$  state. Blue and green colors show regions of positive and negative spin density values respectively.

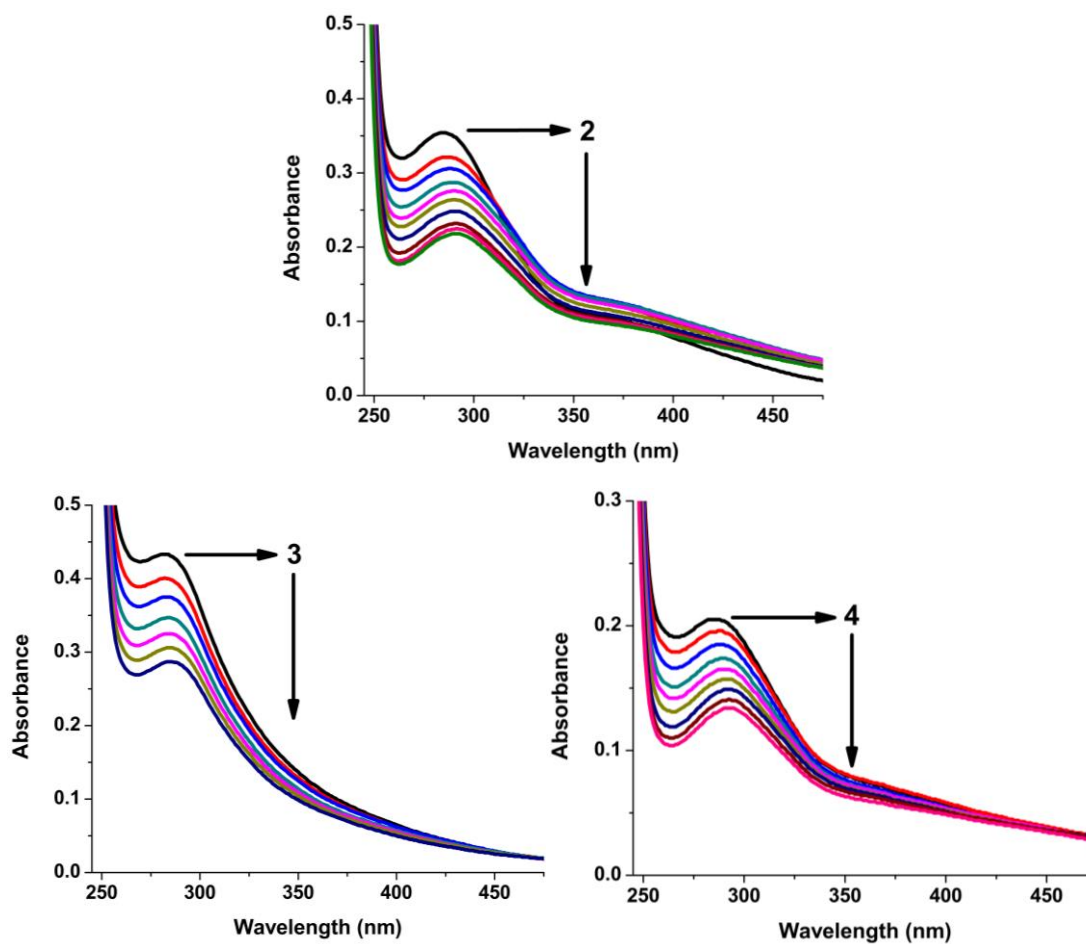

**Fig. S8** Absorbance titrations of the complexes (**2-4**) ( $5 \mu\text{M}$ ) with CT DNA ( $0\text{-}50 \mu\text{M}$ ).

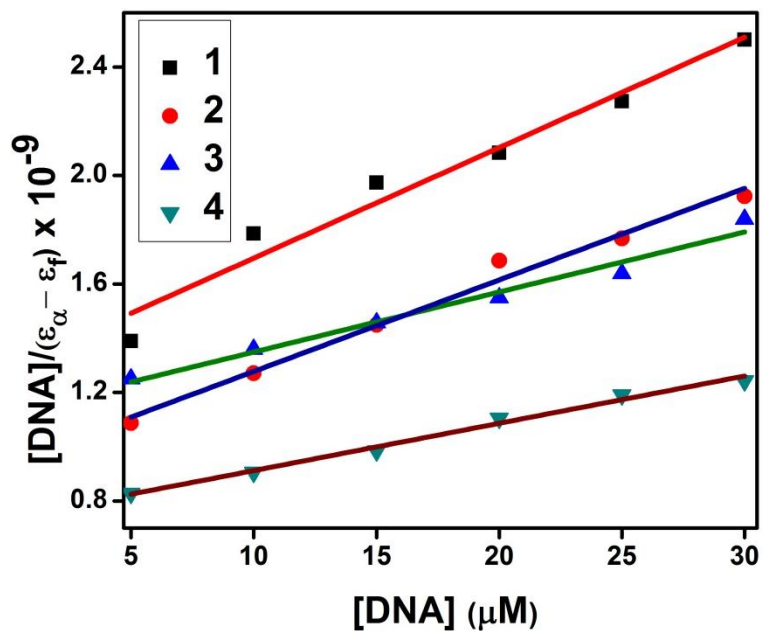

Fig. S9 Stern-Volmer plots of absorbance titrations of the complexes (1-4) with CT DNA.

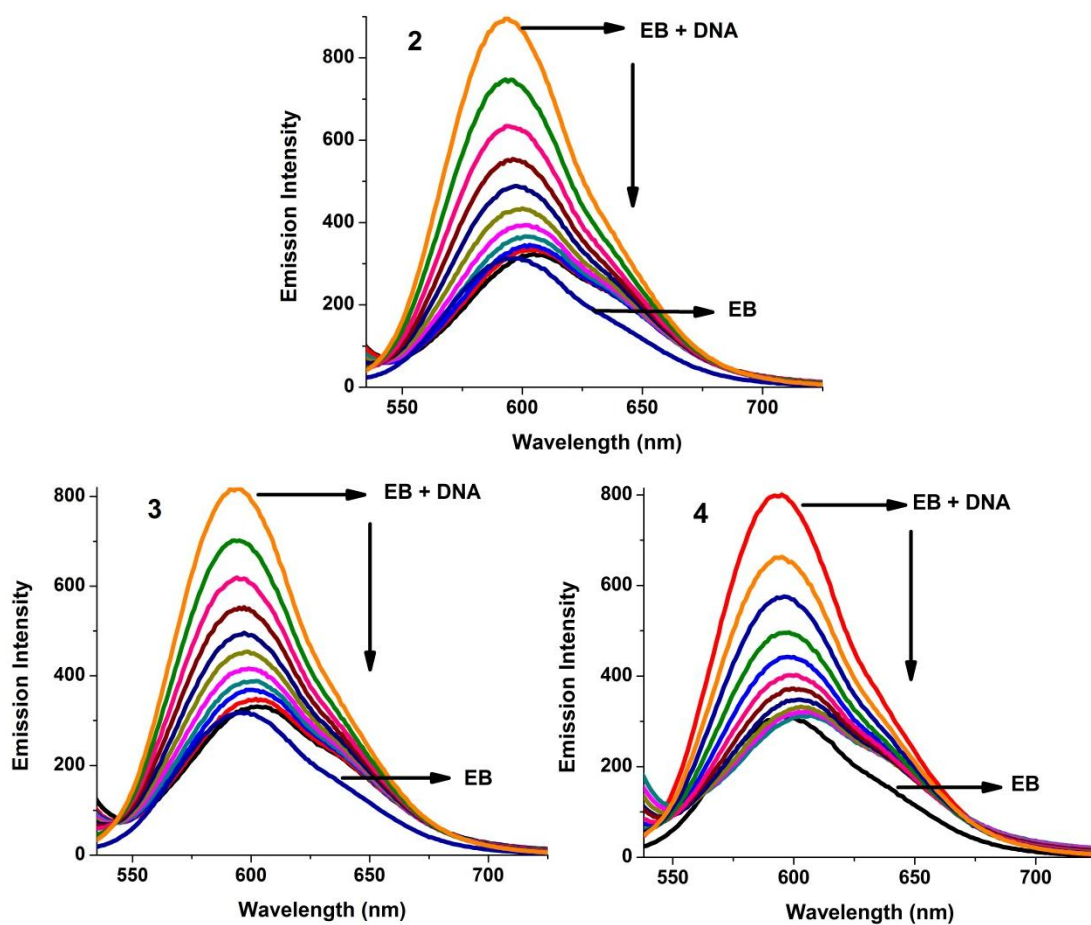

Fig. S10 Fluorescence titrations of the complexes (1-4) (0-50  $\mu\text{M}$ ) with EB bounded CT DNA.

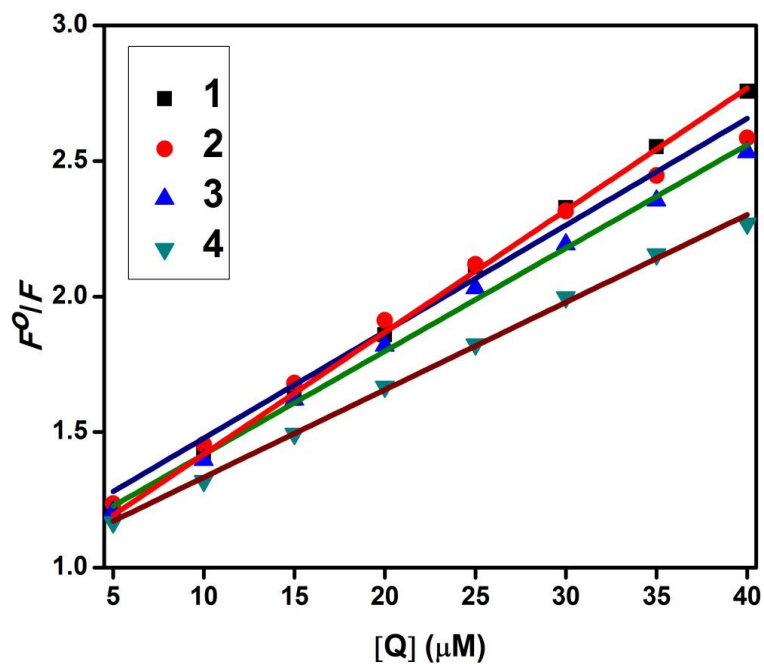

Fig. S11 Stern-Volmer plots of fluorescence titrations of the complexes (1-4) with CT DNA.

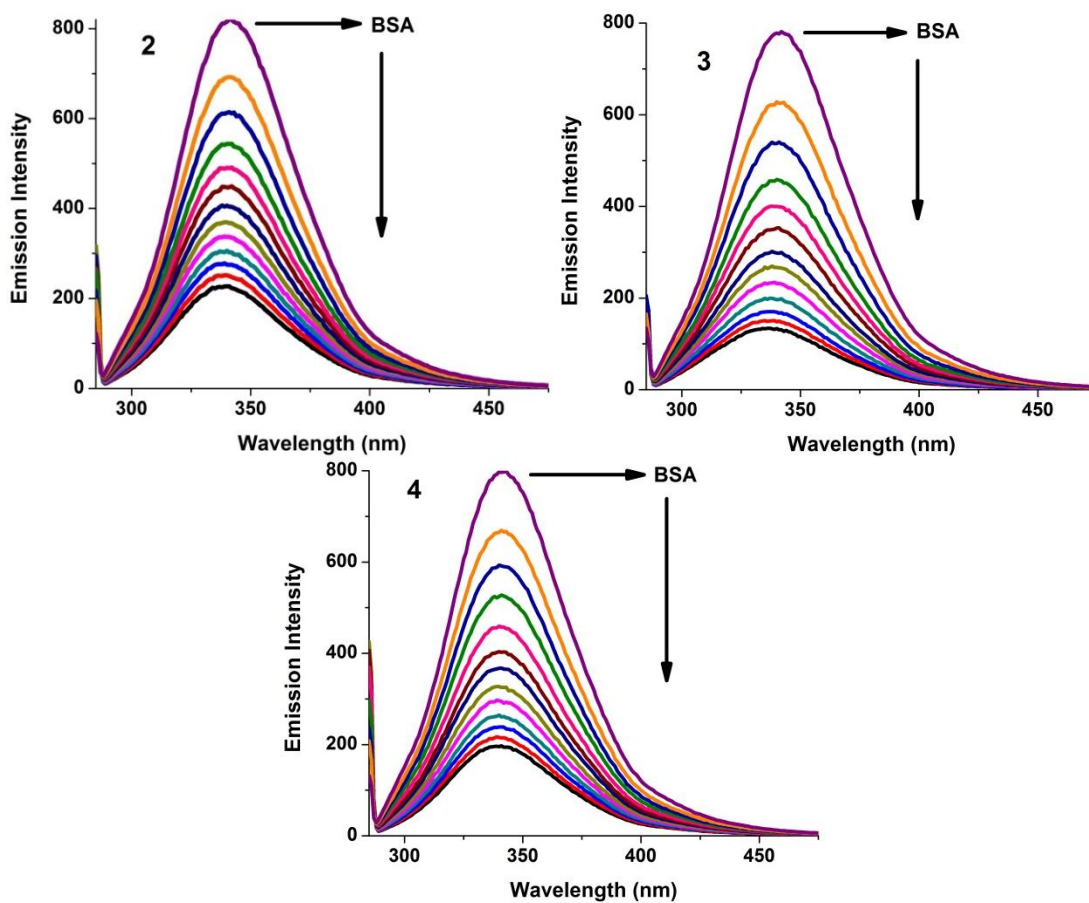

Fig. S12 Fluorescence titrations of the complexes (1-4) ( $2 \mu\text{M}$ ) with BSA ( $1 \mu\text{M}$ ).

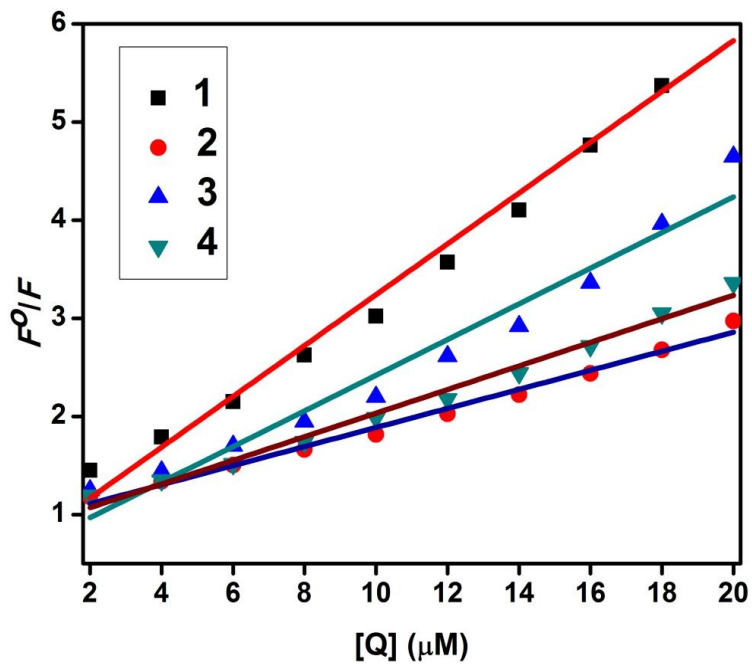

**Fig. S13** Stern-Volmer plots of the fluorescence titrations of the complexes (1-4) with BSA.

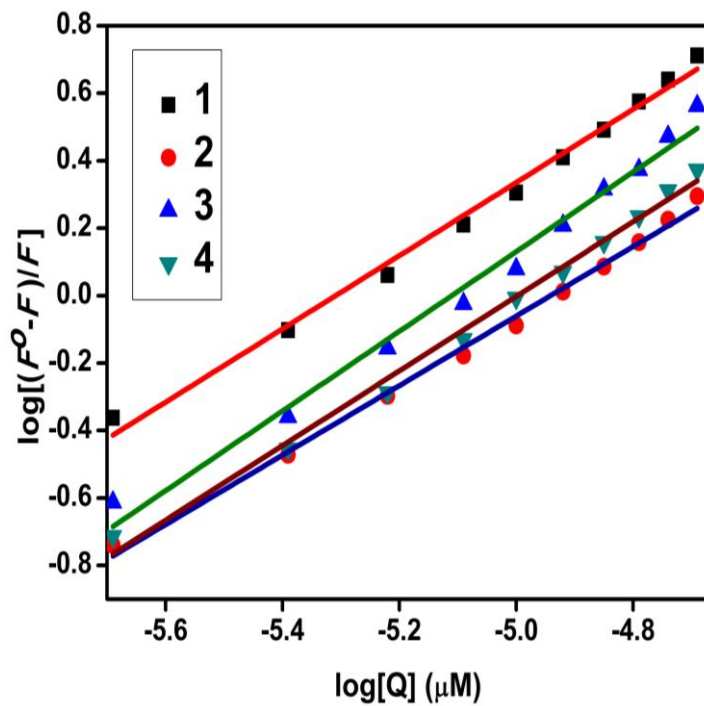

**Fig. S14** Plots of the fluorescence titrations of the complexes (1-4) with BSA.

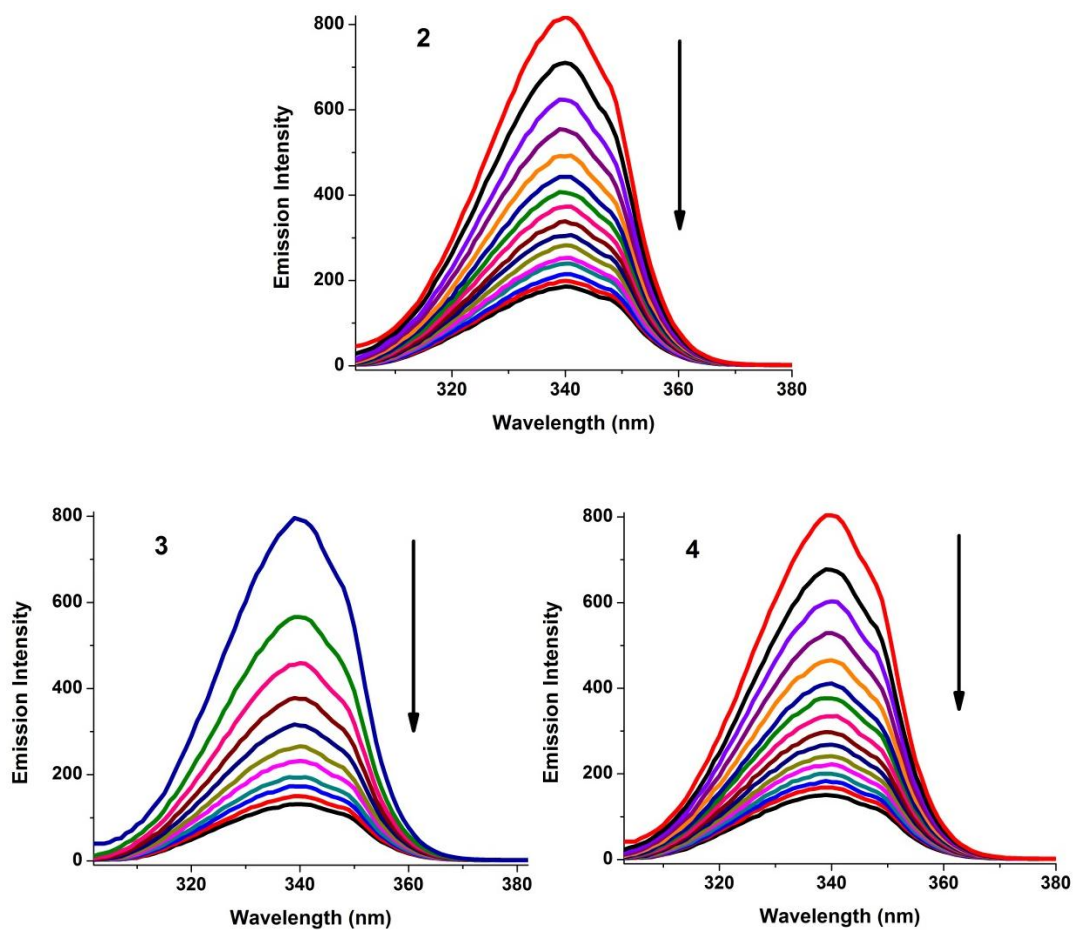

**Fig. S15** Synchronous spectra of BSA (1  $\mu\text{M}$ ) as a function of concentration of the complexes (1–4) (0–20  $\mu\text{M}$ ) with  $\Delta\lambda = 60$  nm.

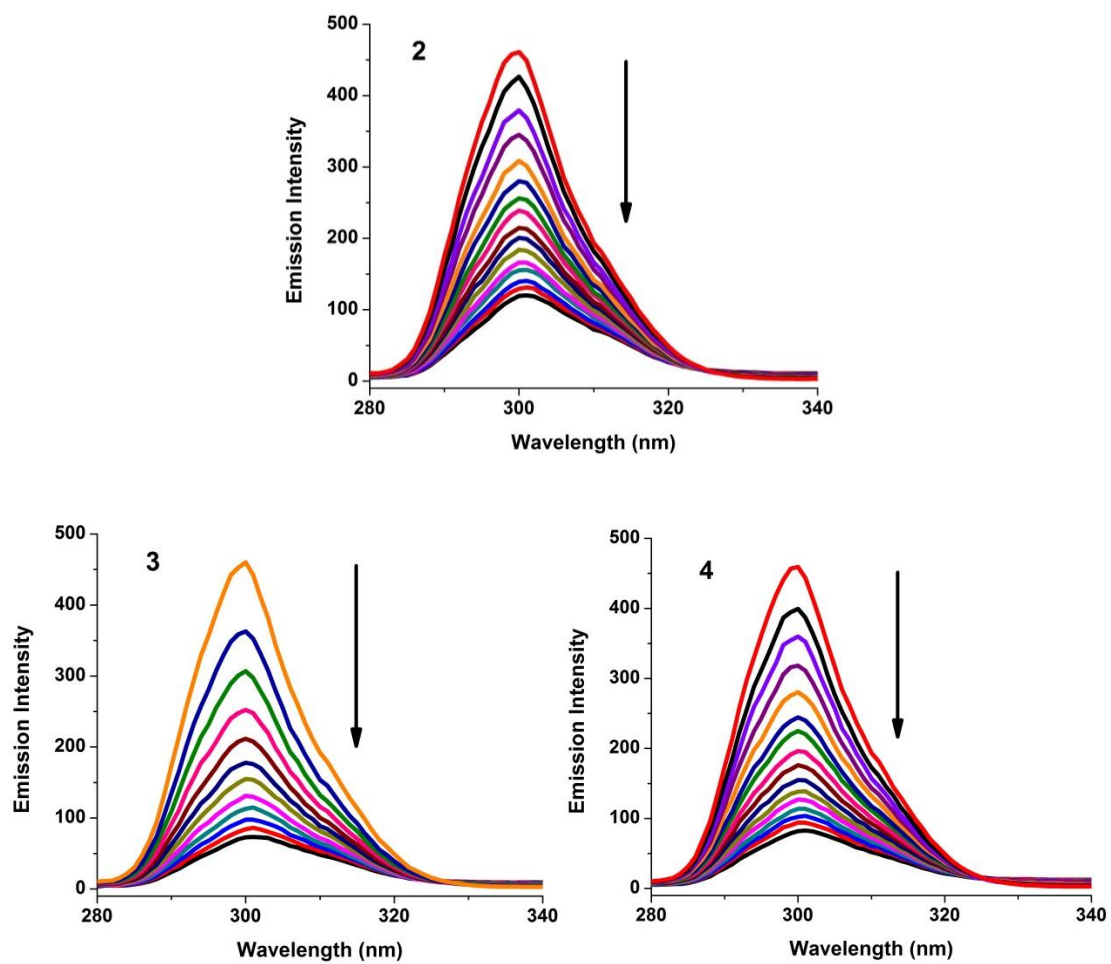

**Fig. S16** Synchronous spectra of BSA (1  $\mu\text{M}$ ) as a function of concentration of the complexes (1-4) (0-20  $\mu\text{M}$ ) with  $\Delta\lambda = 15 \text{ nm}$ .

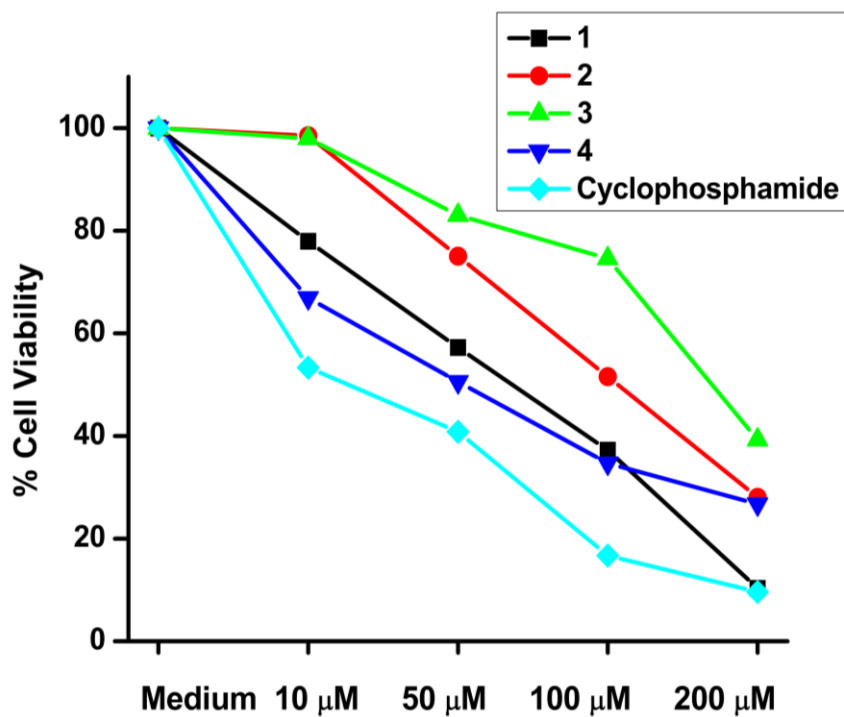

Fig. S17 Cytotoxicity of the complexes (1–4) after 24 h incubation on A549 cell lines.

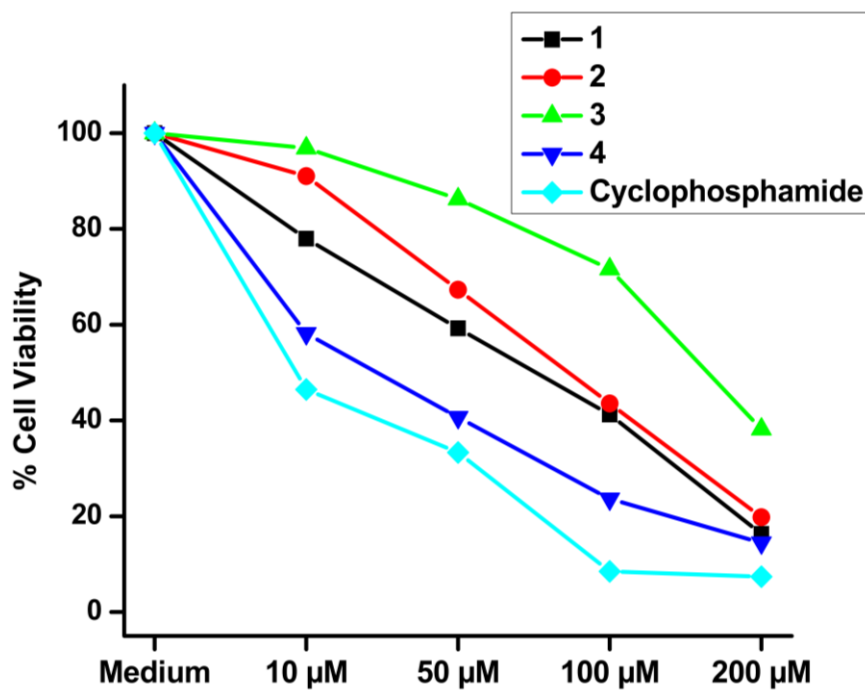

Fig. S18 Cytotoxicity of the complexes (1–4) after 24 h incubation on MCF7 cell lines.
